# Supplementary material for: Serological and Molecular Investigation of Batai Virus Infections in Ruminants from the State of Saxony-Anhalt, Germany, 2018
Source: PubMed Central journal article supplement (PMC7996813; doi:10.3390/v13030370), 2021-02-26
Supplement: viruses-13-00370-s001.pdf [file viruses-13-00370-s001.pdf]

**Supplementary Table S1:**

Percent positivity among individual flocks of each species a) sheep, b) goats, and c) cattle.

## a) Sheep

| Flocks/regions       | Total | Positive animals | Percent Positivity (%) |
|----------------------|-------|------------------|------------------------|
| Laucha/U.            | 10    | 0                | 0                      |
| Haldensleben         | 11    | 8                | 72.7                   |
| Grochewitz           | 20    | 0                | 0                      |
| Genthin              | 10    | 0                | 0                      |
| Kossebau             | 10    | 0                | 0                      |
| Bad Lauchstädt       | 10    | 0                | 0                      |
| Arnstein             | 10    | 1                | 10                     |
| Braunsbedra          | 10    | 2                | 20                     |
| Leuna                | 10    | 1                | 10                     |
| Osternienburger Land | 10    | 7                | 70                     |
| Burg                 | 10    | 1                | 10                     |
| Total                | 121   | 20               | 16.5                   |

## b) Goats

| Flocks/regions    | Total | Positive animals | Percent Positivity (%) |
|-------------------|-------|------------------|------------------------|
| Löbejün           | 20    | 0                | 0                      |
| Schleckweda       | 20    | 11               | 55                     |
| Bitterfeld Wolfen | 10    | 0                | 0                      |
| Jübar             | 10    | 0                | 0                      |
| Total             | 60    | 11               | 18.3                   |

## c) Cattle

| Flocks/regions | Total | Positive animals | Percent Positivity (%) |
|----------------|-------|------------------|------------------------|
| Hohenberg      | 10    | 2                | 20                     |
| Zehrental      | 6     | 6                | 100                    |
| Schönhausen    | 10    | 9                | 90                     |
| Zerbst/Anhalt  | 10    | 3                | 30                     |
| Muldestausee   | 12    | 0                | 0                      |
| Müggenbusch    | 12    | 12               | 100                    |
| Havelberg      | 12    | 5                | 41.7                   |
| Calvörde       | 12    | 4                | 33.3                   |
| Dessau-Roßlau  | 11    | 6                | 54.5                   |
| Kleinzerbst    | 12    | 3                | 25                     |
| Mühro          | 12    | 7                | 58.3                   |
| Weddendorf     | 9     | 0                | 0                      |
| Genthin        | 12    | 1                | 8.3                    |
| Total          | 140   | 58               | 41.4                   |
